# Supplementary material
Source: PubMed Central journal article supplement (PMC4579428)
Supplement: AEM.01524-15_zam999116637so1.pdf [file AEM.01524-15_zam999116637so1.pdf]

**Supplementary Table S1. Raw and rarefied sequence read data for sewage and animal samples.**

| <b>Host group</b> | <b>Bacterial<br/>sequence reads<br/>(total for group)</b> | <b># samples in group</b> | <b>Average reads<sup>b</sup> per sample<br/>after subsampling</b> |
|-------------------|-----------------------------------------------------------|---------------------------|-------------------------------------------------------------------|
| Sewage            | 13,565,089                                                | 18                        | 143,361 <sup>c</sup>                                              |
| Cat               | 7,878,286                                                 | 9                         | 500,000                                                           |
| Chicken           | 4,547,099                                                 | 9                         | 462,212                                                           |
| Cow               | 6,884,544                                                 | 9                         | 500,000                                                           |
| Deer              | 6,188,212                                                 | 8                         | 500,000                                                           |
| Dog               | 6,132,510                                                 | 9                         | 485,038                                                           |
| Swine             | 7,032,645                                                 | 9                         | 500,000                                                           |

<sup>a</sup>Sewage was used as a proxy for human fecal inputs, but it also contains a large proportion of water- and pipe-associated bacteria. We bioinformatically subsampled sewage data to obtain only the fecal signature, as described by Newton et al. 2015, that is predominantly composed of six families: Bacteroidaceae, Rikenellaceae, Porphyromonadaceae, Prevotellaceae, Lachnospiraceae, and Ruminococcaceae.

<sup>b</sup>Individual animal samples were randomly subsampled 500,000 reads if the total was greater; all sequence counts were kept if the total was <500,000.

<sup>c</sup>Sewage reads represent only the fecal portion of sewage, not the total community.



**Supplementary Table S2. Oligotyping analysis: total sequences analyzed, sequences kept after noise filtering, oligotypes generated, nucleotide positions selected for decomposition.**

| Taxon                                    | Total sequences | Sequences after noise filtering <sup>a</sup> | Oligotypes after noise filtering <sup>b</sup> | Nucleotide positions selected <sup>c</sup>                                                                                     |
|------------------------------------------|-----------------|----------------------------------------------|-----------------------------------------------|--------------------------------------------------------------------------------------------------------------------------------|
| <i>Alistipes</i>                         | 436,909         | 434,380                                      | 52                                            | 15,16,20,21,23,24,26,32,33,34,37,40,43,44,50,52                                                                                |
| <i>Bacteroides</i>                       | 2,574,691       | 2,504,099                                    | 187                                           | 0,1,7, 12, 13,14, 15, 16, 20, 21, 22,23, 24, 25, 32, 33, 34, 35, 36, 37, 38, 40, 43, 48, 49, 50, 52, 53                        |
| <i>Blautia</i>                           | 610,105         | 586,640                                      | 152                                           | 1,2,11,14,15,16,19,20,21,23,24,25,26,27,31,35,36,37,38,40,41, 43,44,49,50,53,54,56                                             |
| <i>Coprococcus</i>                       | 173,044         | 164,401                                      | 242                                           | 0,2,14,15,16,19,20,21,23,24,25,26,31,33,35,36,37,38,40,41,42,44,50, 52,53,56                                                   |
| <i>Dorea</i>                             | 95,431          | 94,057                                       | 89                                            | 1,14,16,19,21,22,23,26,31,34,35,36,37,41,49,53,56                                                                              |
| <i>Faecalibacterium</i>                  | 173,618         | 171,276                                      | 101                                           | 3,14,15,18,19,20,21,22,23,24,26,29,31,32,34,35,36,37,44,52                                                                     |
| <i>Lachnospiraceae</i><br>(unclassified) | 1,775,165       | 1,514,466                                    | 613                                           | 0, 1, 2, 3, 13, 14, 15, 16, 17, 19, 20, 21, 22, 23, 24, 25, 26, 31, 32, 34, 37, 38, 40, 41, 42, 43, 44, 48, 49, 50, 51, 53, 56 |
| <i>Parabacteroides</i>                   | 522,886         | 512,607                                      | 103                                           | 0,4,15,16,17,21,22,23,24,34,35,36,37,38,42,44,45,50,51,52,53,55                                                                |
| <i>Prevotella</i>                        | 1,902,562       | 1,869,883                                    | 121                                           | 0, 11, 13, 14, 17, 19, 20, 21, 22, 24, 26, 27, 29, 34, 35, 37, 38, 41, 45, 46, 49, 50, 52, 53, 55, 56, 58                      |
| <i>Roseburia</i>                         | 228,352         | 219,861                                      | 186                                           | 1,2,9,14,15,16,20,21,22,24,26,31,32,35,36,37,38,40,41,50,51,53,56                                                              |

<sup>a</sup>Final number of sequences used in analysis after noise filtering

<sup>b</sup>Noise filtering removed oligotypes present in less than 3 samples or with a minimum substantive abundance equal to [total sequences/5000]

<sup>c</sup>Numbers represent the nucleotide position from 0-*N*, where *N* is the length of the padded sequences in each analysis (*N*≈60 for all taxa).

**Supplementary Table S3.** Proportion of variability in oligotype distributions of ten fecal taxa that can be attributed to differences among host groups. Statistics are based on a non-parametric equivalent of the MANOVA (*adonis*) for community datasets. A paired t-test of *adonis* R<sup>2</sup> values confirmed that pooled values were significantly lower than correlations based on individual animal hosts ( $p=2.0 \times 10^{-10}$ ), and analysis of variance of indicated that this was due to higher variance within the pooled animal group ( $p=2 \times 10^{-16}$ ).

| <b>Taxon</b>                             | <b>Individual Host Groups</b> |          | <b>Sewage vs. Pooled Animals</b> |          |
|------------------------------------------|-------------------------------|----------|----------------------------------|----------|
|                                          | <b>R<sup>2</sup></b>          | <b>p</b> | <b>R<sup>2</sup></b>             | <b>p</b> |
| <i>Alistipes</i>                         | 0.553                         | <0.001   | 0.214                            | <0.001   |
| <i>Bacteroides</i>                       | 0.579                         | <0.001   | 0.184                            | <0.001   |
| <i>Blautia</i>                           | 0.603                         | <0.001   | 0.169                            | <0.001   |
| <i>Coprococcus</i>                       | 0.585                         | <0.001   | 0.179                            | <0.001   |
| <i>Dorea</i>                             | 0.625                         | <0.001   | 0.160                            | <0.001   |
| <i>Faecalibacterium</i>                  | 0.557                         | <0.001   | 0.184                            | <0.001   |
| <i>Lachnospiraceae</i><br>(unclassified) | 0.620                         | <0.001   | 0.178                            | <0.001   |
| <i>Parabacteroides</i>                   | 0.516                         | <0.001   | 0.170                            | <0.001   |
| <i>Prevotella</i>                        | 0.565                         | <0.001   | 0.149                            | <0.001   |
| <i>Roseburia</i>                         | 0.549                         | <0.001   | 0.191                            | <0.001   |

**Supplementary Figure S2.** Sewage signature correlations between sanitary sewage and environmental samples.

Spearman's rank coefficients (*rho*) and significance values (*p*) are given for each data pair; significant values ( $p < 0.0071$ ) based on corrected alpha are noted (\*). A) Spain sanitary sewage, B) Brazil sanitary sewage, C) sewage-contaminated stormwater, D) clean stormwater, E) Lake Michigan after a CSO, F) Lake Michigan during baseflow compared to the US sewage signature; and Brazil river with human fecal contamination versus Brazil sewage signature (G) or US sewage signature (H).

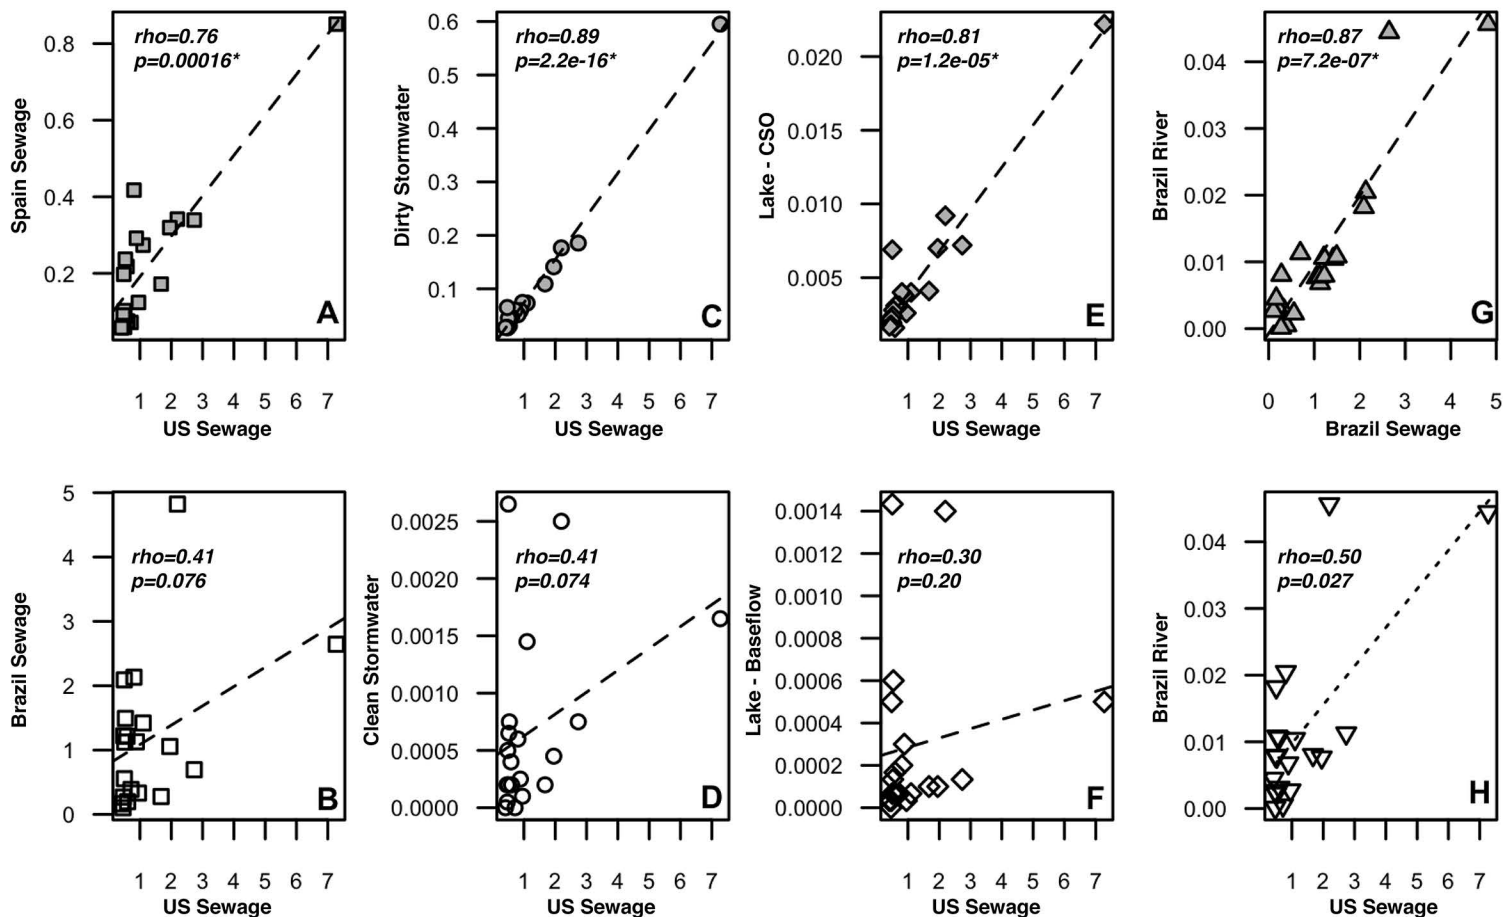

## REFERENCES CITED

**Newton RJ, McLellan SL, Dila DK, Vineis JH, Morrison HG, Eren AM, Sogin ML.**  
2015. Sewage reflects the microbiomes of human populations. *mBio* **6**(2):e02574-14.
